# Supplementary material for: Identification of a novel mechanism of blood–brain communication during peripheral inflammation via choroid plexus‐derived extracellular vesicles
Source: PubMed Central journal article supplement (PMC5048366; doi:10.15252/emmm.201606271), 2016-09-05
Supplement: EMMM-8-1162-s002.pdf [file EMMM-8-1162-s002.pdf]

## Expanded View Figures

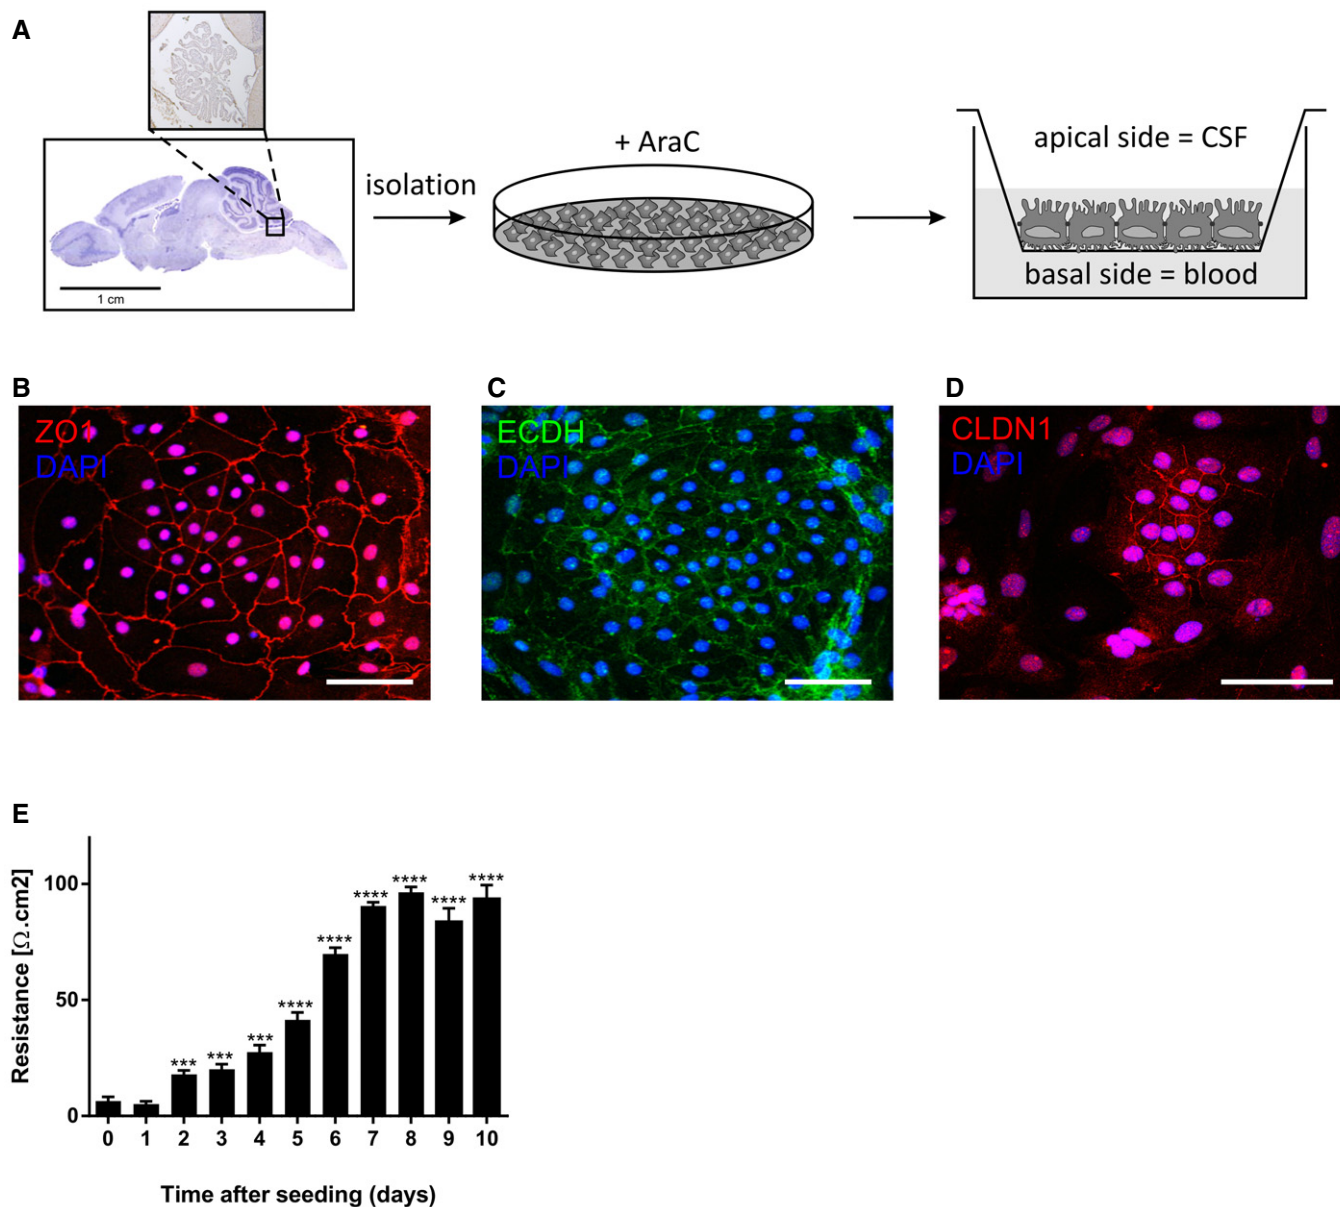

**Figure EV1. Characterization of the primary CPE cell culture.**

A Schematic representation of the procedures of primary CPE cell isolation and culture in the transwell system.

B, D Representative confocal images showing the expression of zona occludens (ZO1, red, B), E-cadherin (ECDH, green, C), and claudin-1 (CLDN1, red, D) in the primary CPE culture. Scale bars, 30  $\mu$ m.

E TEER values of the primary CPE cells grown in the transwell system. Significance was calculated compared with day 0 ( $n = 6$ ). Data are presented as means  $\pm$  SEM. Data were analyzed by Student's  $t$ -test. Significance levels are indicated on the graphs: \*\*\* $0.0001 \leq P < 0.001$ ; \*\*\*\* $P < 0.0001$ .

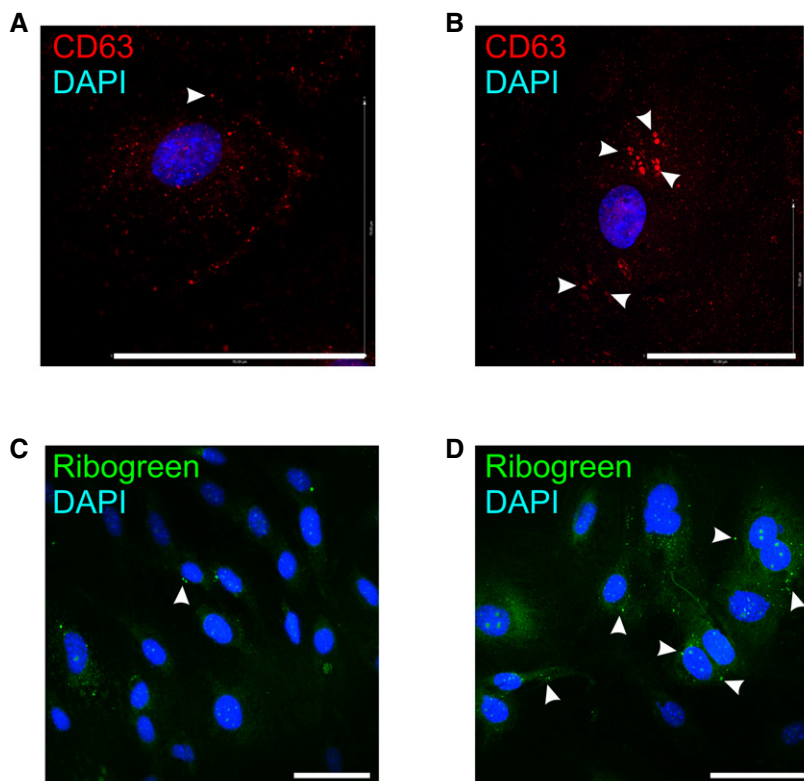

**Figure EV2. Analysis of the exosomal machinery in the CPE cells upon systemic inflammation.**

A–D Representative CD63 (red, A, B) and Ribogreen (green, C, D) staining of primary CPE cells after 12 h in the absence (A, C) or presence (B, D) of LPS *in vitro* from two independent experiments with  $n = 3$ . The white arrows indicate CD63 (A, B) or Ribogreen (C, D) positive vesicles. Scale bars, 70  $\mu\text{m}$ .

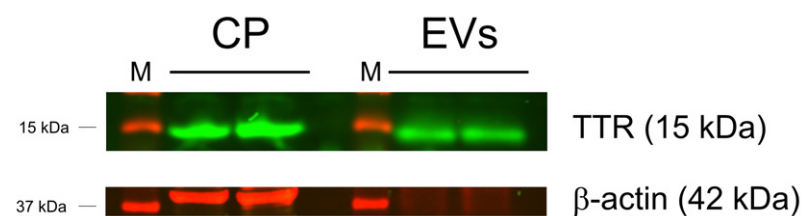

**Figure EV3. Western blot analysis of choroid plexus cell lysates and EVs isolated from CSF.**

Choroid plexus (CP) tissue was isolated, pooled from three mice, lysed, and analyzed by SDS–PAGE. Similarly, EVs were isolated from  $\sim 25 \mu\text{l}$  CSF and analyzed by SDS–PAGE. Detection was done with an anti-TTR antibody (green) and an anti- $\beta$ -actin antibody (red) using the Odyssey Imaging system.

**Figure EV4. Analysis of the exosomal machinery in CPE cells upon systemic inflammation.**

A–E QPCR gene expression analysis of exosomal markers *Cd9* (A), *Cd81* (B), *Hspa1a* (C), *Cd63* (D), and *Anxa5* (E) in the choroid plexus before and after LPS treatment ( $n = 4$ ). Data are displayed as mean  $\pm$  SEM and analyzed by Student's *t*-test. Significance levels are indicated on the graphs:  $*0.01 \leq P < 0.05$ ;  $**0.001 \leq P < 0.01$ . F–K Representative TEM images from choroid plexus tissue isolated 0 (F), 1 (G), 2 (H), 3 (I), 4 (J), or 6 (K) h after LPS injection. Black arrow heads point to exosomes present in MVBs. Scale bars, 9  $\mu\text{m}$ . Mv, microvilli; Nu, nucleus. L–N *In situ* hybridization (ISH) analysis of miR expression in CPE cells *in vivo*. LNA<sup>TM</sup>-ISH of miR-146a (L), miR-9 (M), and miR-155 (N) on brain sections. Scale bars, 30  $\mu\text{m}$ .

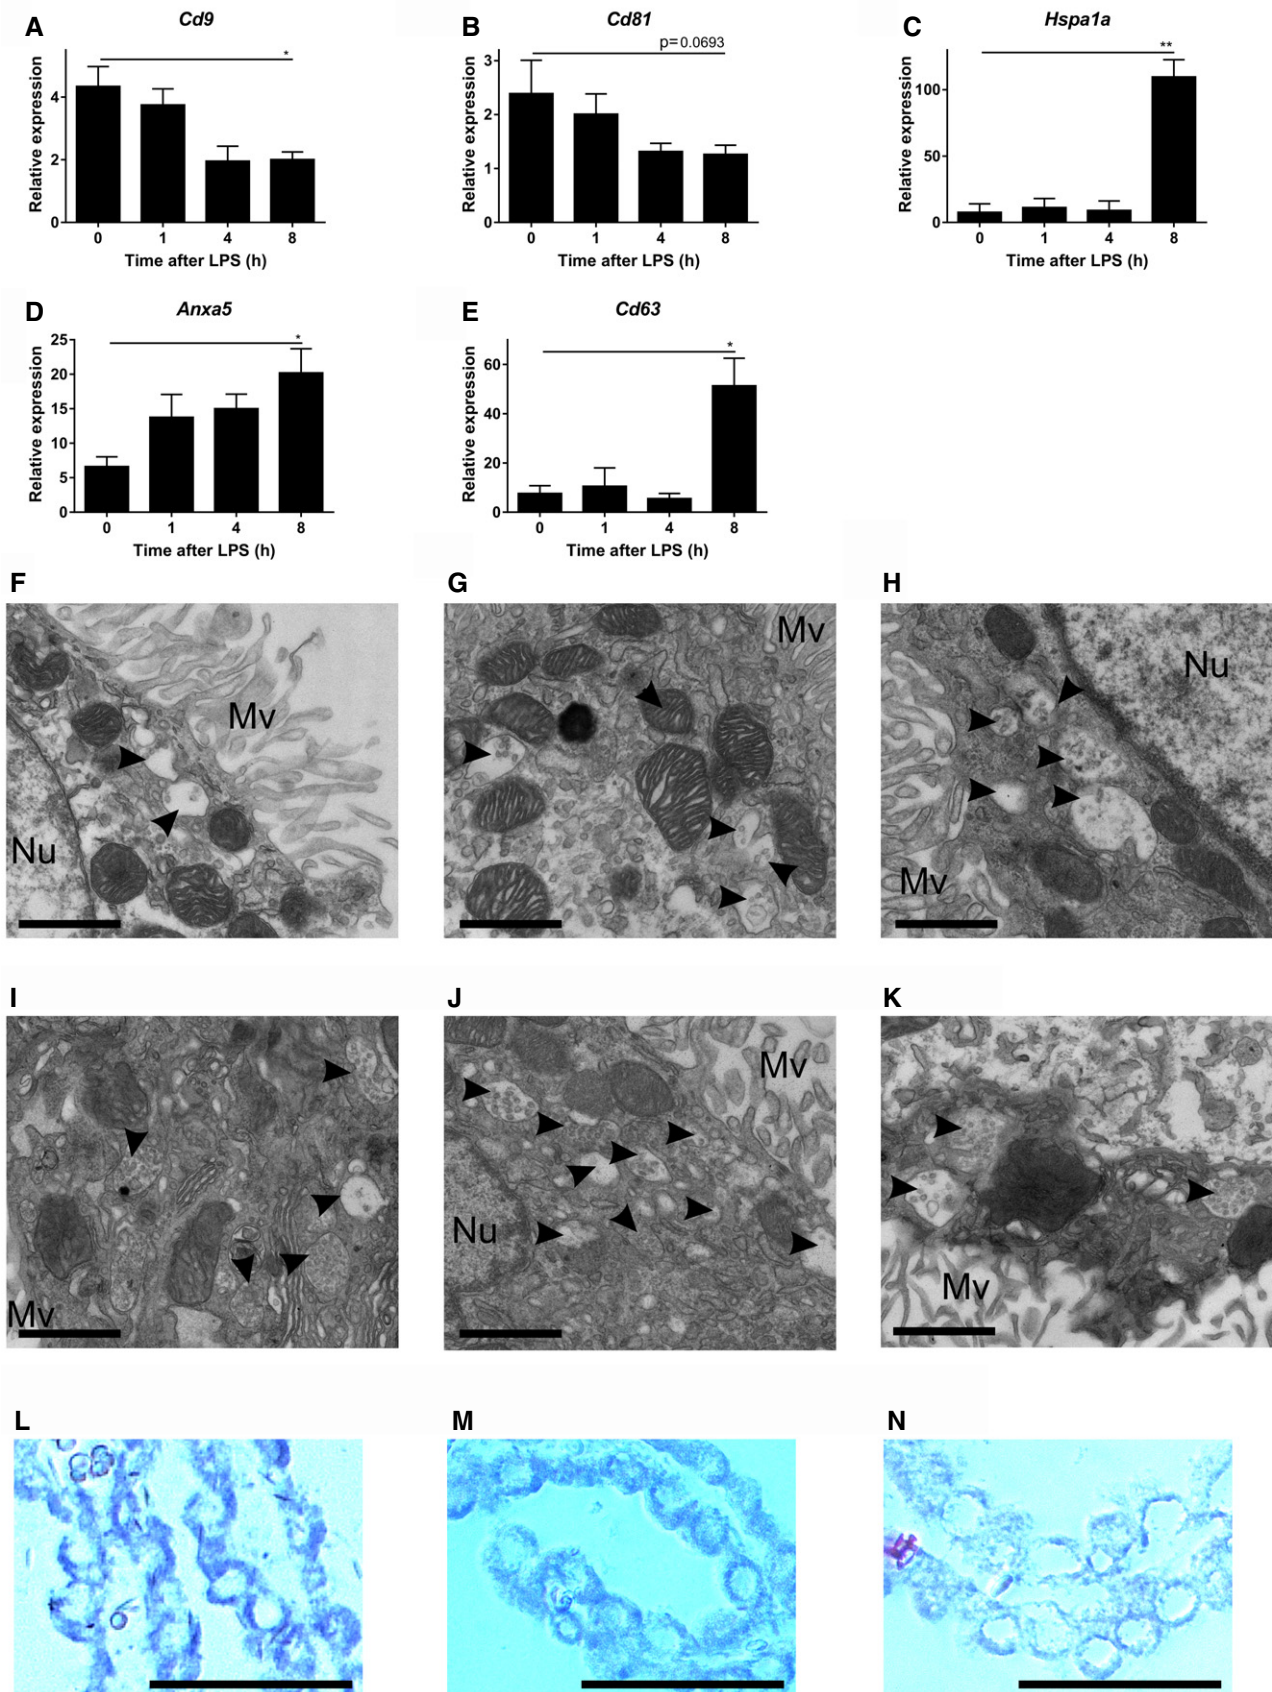

Figure EV4.

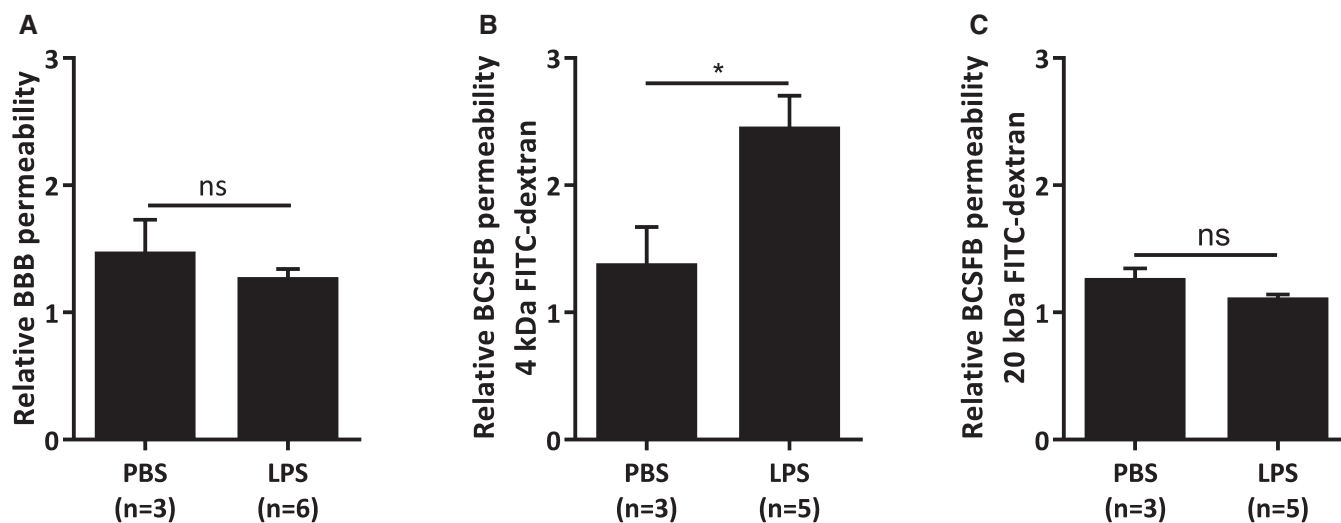

**Figure EV5. Analysis of blood–brain barrier (BBB) and blood-CSF barrier (BCSFB) leakage upon systemic inflammation.**

A–C Relative BBB (A) and BCSFB (B, C) leakage upon LPS injection. Mice were injected with PBS or LPS, followed 3 h later by i.v. injection of 4 kDa (A, B) or 20 kDa (C) FITC-dextran. One hour later, CSF was isolated and fluorescence was measured using a fluorometer to determine the relative BCSFB leakage ( $\lambda_{\text{ex}}/\lambda_{\text{em}} = 488 \text{ nm}/520 \text{ nm}$ ). Additionally, brains were isolated and incubated in formamide overnight at 37°C. The next day, the supernatant was isolated and fluorescence was measured using a fluorometer ( $\lambda_{\text{ex}}/\lambda_{\text{em}} = 488 \text{ nm}/520 \text{ nm}$ ) to determine the relative BBB leakage. Data are displayed as mean  $\pm$  SEM and analyzed by Student's *t*-test. Significance levels are indicated on the graphs: \*0.01  $\leq P < 0.05$ .
